# Supplementary material for: Sustained negative mental health outcomes among healthcare workers over the first year of the COVID-19 pandemic: a prospective cohort study
Source: bioRxiv or medRxiv preprint supplement (doi:10.1101/2021.11.21.21266594), 2021-11-24
Supplement: Supplementary file [file media-1.pdf]

**Sustained negative mental health outcomes among healthcare workers over the first year of the COVID-19 pandemic: a prospective cohort study**

Supplementary material

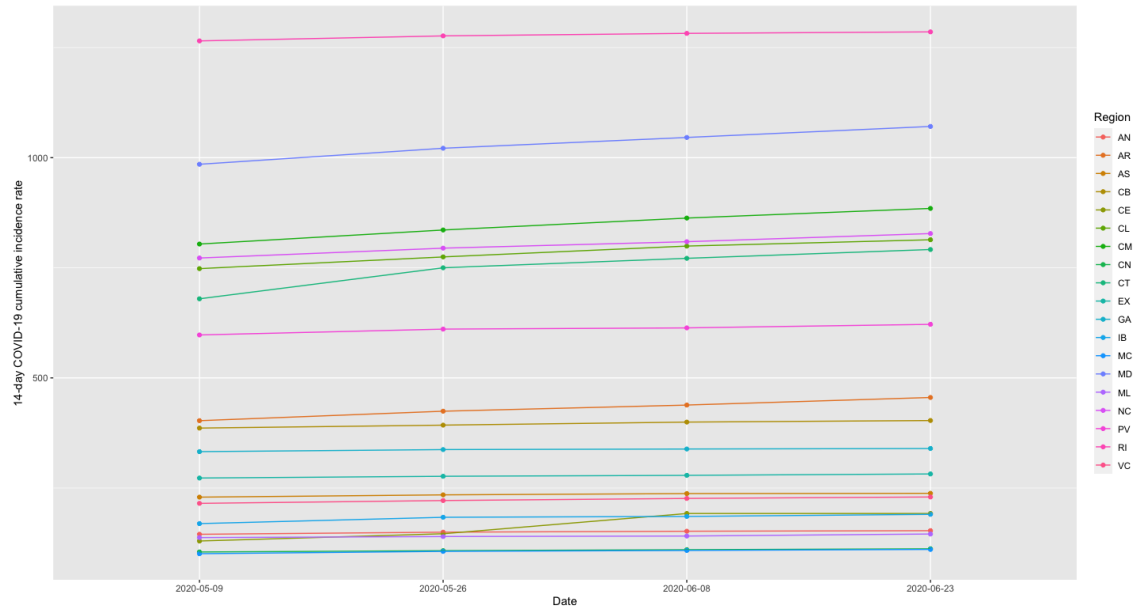

**Supplementary Figure 1.** 14-day cumulative incidence by region at 2, 4, 6 and 8 weeks after the study onset. AN = Andalucía, AR = Aragón, AS = Asturias, CB = Cantabria, CE = Ciudad Autónoma de Ceuta, CL = Castilla y León, CM = Castilla-La Mancha, CN = Canarias, CT = Cataluña, EX = Extremadura, GA = Galicia, IB = Islas Baleares, MC = Región de Murcia, ML = Ciudad Autónoma de Melilla, NC = Comunidad Foral de Navarra, PV = País Vasco, RI = La Rioja, VC = Comunidad Valenciana. [The COVID-19 HEalth caRe wOrkErS (HEROES) Study, Spain, 2021]

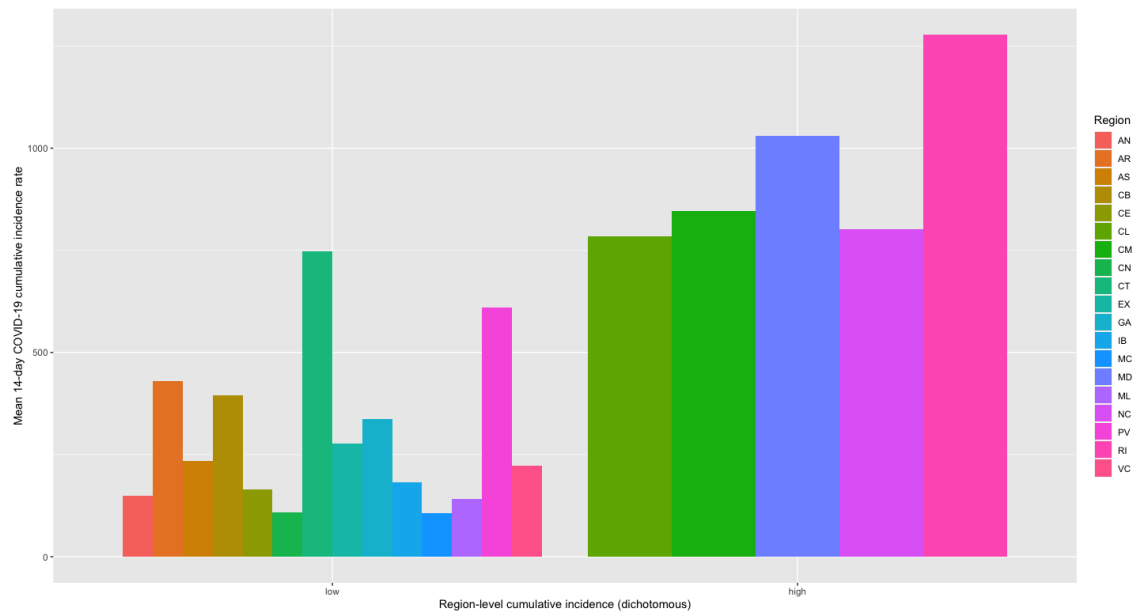

**Supplementary Figure 2.** 14-day cumulative incidence by region at 2, 4, 6 and 8 weeks after the study onset (bis). AN = Andalucía, AR = Aragón, AS = Asturias, CB = Cantabria, CE = Ciudad Autónoma de Ceuta, CL = Castilla y León, CM = Castilla-La Mancha, CN = Canarias, CT = Cataluña, EX = Extremadura, GA = Galicia, IB = Islas Baleares, MC = Región de Murcia, ML = Ciudad Autónoma de Melilla, NC = Comunidad Foral de Navarra, PV = País Vasco, RI = La Rioja, VC = Comunidad Valenciana. [The COVID-19 HEalth caRe wOrkErS (HEROES) Study, Spain, 2021]

**Supplementary Table 1.**

Sampling strategy across health and care facilities in the main study locations (Andalucía, Madrid, and Murcia). [The COVID-19 HEalth caRe wOrkErS (HEROES) Study, Spain, 2021]

| Region  | Recruitment unit                                                            | Type of unit                | Sampling strategy                                                                        |
|---------|-----------------------------------------------------------------------------|-----------------------------|------------------------------------------------------------------------------------------|
| All     | Sociedad Española de Medicina Preventiva, Salud Pública e Higiene (SEMPSPH) | Medical association         | Representativeness approached by researcher; snowball sampling (text messages, emails)   |
| All     | Asociación Nacional de Psicólogos y Residentes (ANPIR)                      | Psychological association   | Representativeness approached by researcher; snowball sampling (text messages, emails)   |
| Cádiz   | Hospital Universitario Puerto Real                                          | General hospital            | Representativeness approached by researcher                                              |
| Granada | Hospital Regional Clínico Universitario San Cecilio                         | General hospital            | Representativeness approached by researcher                                              |
| Granada | Unidad de Gestión Clínica Almanjáyar                                        | Outpatient specialty center | Representativeness approached by researcher                                              |
| Granada | Unidad de Gestión Clínica Cartuja                                           | Outpatient specialty center | Representativeness approached by researcher                                              |
| Granada | Unidad de Gestión Clínica Gran Capitán                                      | Outpatient specialty center | Representativeness approached by researcher                                              |
| Huelva  | Hospital Juan Ramón Jiménez                                                 | General hospital            | Representativeness approached by researcher                                              |
| Madrid  | Colmenar Viejo Sur                                                          | Outpatient specialty center | Snowball sampling (text messages); billboard                                             |
| Madrid  | Hospital Universitario La Paz                                               | General hospital            | Pop-up alert embedded in electronic system; snowball sampling (text messages); billboard |
| Madrid  | Oficina Regional de Salud Mental                                            | Outpatient specialty center | Representativeness approached by researcher                                              |
| Madrid  | Hospital Universitario La Princesa                                          | General hospital            | Snowball sampling (text messages)                                                        |
| Madrid  | Unión General de Trabajadores (UGT)                                         | Labor union                 | Representativeness approached by researcher                                              |
| Madrid  | Comisiones Obreras (CCOO)                                                   | Labor union                 | Representativeness approached by researcher                                              |
| Madrid  | Sindicato de Enfermería (SATSE)                                             | Labor union                 | Representativeness approached by researcher                                              |
| Madrid  | Asociación de Médicos y Titulados Superiores (AMYTS)                        | Labor union                 | Representativeness approached by researcher                                              |
| Málaga  | Unión General de Trabajadores (UGT)                                         | Labor union                 | Representativeness approached by researcher                                              |
| Málaga  | Hospital Regional Universitario de Málaga                                   | General hospital            | Snowball sampling (text messages)                                                        |
| Málaga  | Central Sindical Independiente y de Funcionarios (CSIF)                     | Labor union                 | Representativeness approached by researcher                                              |
| Málaga  | Comisiones Obreras (CCOO)                                                   | Labor union                 | Representativeness approached by researcher                                              |
| Málaga  | Hospital Universitario Virgen de la Victoria                                | General hospital            | Snowball sampling (text messages)                                                        |
| Málaga  | Sindicato de Enfermería (SATSE)                                             | Labor union                 | Representativeness approached by researcher                                              |

|         |                                                               |                                   |                                                                                        |
|---------|---------------------------------------------------------------|-----------------------------------|----------------------------------------------------------------------------------------|
| Málaga  | Sindicato de Técnicos Auxiliares de Enfermería (SAE)          | Labor union                       | Representativeness approached by researcher                                            |
| Málaga  | Local non-hospital emergency departments (Málaga-Guadalhorce) | Non-hospital emergency department | Representativeness approached by researcher; snowball sampling (text messages, emails) |
| Málaga  | Hospital Comarcal de la Axarquía                              | General hospital                  | Representativeness approached by researcher                                            |
| Málaga  | Hospital Comarcal Antequera                                   | General hospital                  | Representativeness approached by researcher                                            |
| Málaga  | Medical Residents Coordination Office                         | Professional network              | Representativeness approached by researcher                                            |
| Málaga  | Hospital San Juan de Dios                                     | Private hospital                  | Representativeness approached by researcher                                            |
| Málaga  | Local health office (Norte de Málaga-Antequera)               | Primary care center               | Representativeness approached by researcher                                            |
| Málaga  | Local health office (Serranía de Málaga)                      | Primary care center               | Representativeness approached by researcher                                            |
| Málaga  | Local health office (Este de Málaga-Axarquía)                 | Primary care center               | Representativeness approached by researcher                                            |
| Murcia  | Hospital Clínico Universitario Virgen de la Arrixaca          | General hospital                  | Representativeness approached by researcher; snowball sampling (text messages, emails) |
| Murcia  | Hospital Los Arcos                                            | General hospital                  | Representativeness approached by researcher; snowball sampling (text messages, emails) |
| Murcia  | Oficina Regional de Salud Mental                              | Outpatient specialty center       | Representativeness approached by researcher                                            |
| Murcia  | Instituto Murciano de Investigación Biomédica (IMIB)          | Health research institute         | Representativeness approached by researcher; snowball sampling (text messages, emails) |
| Murcia  | Colegio de Médicos                                            | Medical association               | Representativeness approached by researcher                                            |
| Murcia  | Colegio de Enfermería                                         | Nursing association               | Representativeness approached by researcher                                            |
| Murcia  | Colegio de Farmacia                                           | Pharmaceutical association        | Representativeness approached by researcher                                            |
| Murcia  | Colegio de Fisioterapia                                       | Physiotherapeutical association   | Representativeness approached by researcher                                            |
| Murcia  | Comité Empresa (Sindicato)                                    | Labor union                       | Representativeness approached by researcher                                            |
| Murcia  | Primary care network                                          | Professional network              | Representativeness approached by researcher                                            |
| Sevilla | Hospital Universitario Virgen de Valme                        | General hospital                  | Representativeness approached by researcher                                            |
| Sevilla | Área de Gestión Sanitaria Sur de Sevilla                      | Primary care center               | Representativeness approached by researcher                                            |

**Supplementary Table 2.**

Response rates across recruitment units. [The COVID-19 HEalth caRe wOrkErS (HEROES) Study, Spain, 2021]

| Region                                       | Recruitment unit                                     | Type of unit                          | Response rate (%)                 |      |
|----------------------------------------------|------------------------------------------------------|---------------------------------------|-----------------------------------|------|
| Spain                                        | Grupo 5                                              | Socio-community mental health centers | 28.2                              |      |
| Madrid                                       | Hospital Universitario La Paz                        | General hospital                      | 67.6 <sup>2</sup>                 |      |
|                                              |                                                      |                                       |                                   |      |
|                                              | Emergency Department (Children's hospital)           |                                       |                                   |      |
|                                              | Nurses                                               |                                       | 3.1                               |      |
|                                              | Nurse technicians                                    |                                       | 7.7                               |      |
|                                              | Total                                                |                                       | 5.2                               |      |
|                                              | Emergency Department (Adult hospital)                |                                       |                                   |      |
|                                              | Nurses                                               |                                       | 6.7                               |      |
|                                              | Nurse technicians                                    |                                       | 3.5                               |      |
|                                              | Physicians                                           |                                       | 25.5                              |      |
|                                              | Total                                                |                                       | 8.6                               |      |
|                                              | Department of General Surgery (Adult hospital)       |                                       |                                   |      |
|                                              | Nurses                                               |                                       | 19.6                              |      |
|                                              | Nurse technicians                                    |                                       | 5.6                               |      |
|                                              | Physicians                                           |                                       | 13.4                              |      |
|                                              | Total                                                |                                       | 13.4                              |      |
|                                              | ICUs (Adult hospital)                                |                                       |                                   |      |
|                                              | Nurses                                               |                                       | 10.9                              |      |
|                                              | Nurse technicians                                    |                                       | 2.7                               |      |
|                                              | Physicians                                           |                                       | 8.0                               |      |
|                                              | Total                                                |                                       | 8.1                               |      |
|                                              | ICU (Children's Hospital: nurses)                    |                                       |                                   | 8.9  |
|                                              | Department of Anesthesiology (physicians)            |                                       |                                   | 4.2  |
| Department of Internal Medicine (physicians) |                                                      |                                       | 22.2                              |      |
| Department of Gastroenterology (physicians)  |                                                      |                                       | 6.1                               |      |
| Department of Pneumology (physicians)        |                                                      |                                       | 6.9                               |      |
| Department of Neurology (physicians)         |                                                      |                                       | 7.7                               |      |
| Department of Mental Health                  |                                                      |                                       |                                   |      |
| Psychiatrists                                |                                                      |                                       | 34.1                              |      |
| Clinical psychologists                       |                                                      |                                       | 14.8                              |      |
| Total                                        |                                                      |                                       | 26.8                              |      |
| Orderly team                                 |                                                      |                                       | 26.1                              |      |
| Andalucía                                    | FAISEM                                               | Socio-community mental health centers | 24.0                              |      |
| Badajoz                                      | Talarrubias                                          | Primary care center                   | 90.0                              |      |
| Granada                                      | Almanjayar                                           | Primary care center                   | 38.5                              |      |
| Granada                                      | Cartuja                                              | Primary care center                   | 21.9                              |      |
| Granada                                      | Gran Capitán                                         | Primary care center                   | 12.3                              |      |
| Málaga                                       | Alameda Perchel                                      | Primary care center                   | 36.8                              |      |
| Málaga                                       | Rincón de la Victoria                                | Primary care center                   | 8.3                               |      |
| Málaga                                       | Urgencias Distrito Hospital Clínico                  | Emergency Unit                        | 14.6                              |      |
| Murcia                                       | Los Barreros                                         | Primary care center                   | 68.2                              |      |
| Murcia                                       | Isaac Peral                                          | Primary care center                   | 27.5                              |      |
| Murcia                                       | San Andrés                                           | Primary care center                   | 16.7                              |      |
| Murcia                                       | Mental health center of Cartagena                    | Mental health center                  | 80.4                              |      |
| Murcia                                       | Consejería de Salud (COVID-19 contact tracers)       | Regional Health Office                | 81.3                              |      |
| Murcia                                       | Consejería de Salud (others)                         | Regional Health Office                | 35.0                              |      |
| Murcia                                       | Hospital Clínico Universitario Virgen de la Arrixaca | General hospital                      |                                   |      |
|                                              |                                                      |                                       |                                   |      |
|                                              |                                                      |                                       | Department of Pediatrics          | 100  |
|                                              |                                                      |                                       | Department of Preventive Medicine | 94.4 |
|                                              | Department of Oncology                               |                                       | 5.7                               |      |

**Supplementary Table 3.**

Psychological distress, depression symptoms, and posttraumatic stress disorder symptoms among all follow-up respondents (N = 1,807). [The COVID-19 HEalth caRe wOrkErS (HEROES) Study, Spain, 2021]

|                                   | Psychological distress (GHQ-12) |                     | Depression symptoms (PHQ-9) |                     | PTSD symptoms (PC-PTSD-5) |                     |
|-----------------------------------|---------------------------------|---------------------|-----------------------------|---------------------|---------------------------|---------------------|
|                                   | n (%) <sup>a</sup>              | M (SD) <sup>b</sup> | n (%) <sup>a</sup>          | M (SD) <sup>b</sup> | n (%) <sup>a</sup>        | M (SD) <sup>b</sup> |
| Overall                           | 881 (56)                        | 3.8 (3.4)           | 326 (21)                    | 6.3 (5.1)           | 781 (51)                  | 2.6 (1.6)           |
| <b>Age group</b>                  |                                 |                     |                             |                     |                           |                     |
| 18-35                             | 290 (59)                        | 4 (3.3)             | 115 (25)                    | 6.9 (4.8)           | 273 (60)                  | 2.9 (1.5)           |
| 36-50                             | 367 (56)                        | 3.9 (3.5)           | 140 (22)                    | 6.5 (5.2)           | 334 (53)                  | 2.6 (1.6)           |
| Over 50                           | 204 (52)                        | 3.6 (3.5)           | 64 (16)                     | 5.6 (5.1)           | 157 (40)                  | 2.2 (1.6)           |
| <b>Gender</b>                     |                                 |                     |                             |                     |                           |                     |
| Male                              | 166 (48)                        | 3.3 (3.5)           | 45 (13)                     | 5.3 (5.1)           | 133 (40)                  | 2.1 (1.5)           |
| Female                            | 714 (58)                        | 3.9 (3.4)           | 281 (23)                    | 6.7 (5)             | 648 (55)                  | 2.7 (1.6)           |
| <b>Educational level</b>          |                                 |                     |                             |                     |                           |                     |
| Primary studies                   | 5 (36)                          | 3 (3.7)             | 2 (13)                      | 5 (6.6)             | 6 (40)                    | 2.1 (1.7)           |
| Secondary studies                 | 176 (51)                        | 3.7 (3.5)           | 75 (22)                     | 6.6 (5.5)           | 181 (54)                  | 2.7 (1.6)           |
| University studies                | 698 (57)                        | 3.9 (3.4)           | 249 (21)                    | 6.3 (4.9)           | 591 (51)                  | 2.5 (1.6)           |
| <b>Parental educational level</b> |                                 |                     |                             |                     |                           |                     |
| Primary studies                   | 267 (52)                        | 3.6 (3.4)           | 96 (19)                     | 6 (5)               | 245 (49)                  | 2.5 (1.6)           |
| Secondary studies                 | 275 (58)                        | 3.9 (3.3)           | 96 (20)                     | 6.6 (4.8)           | 250 (55)                  | 2.7 (1.5)           |
| University studies                | 306 (56)                        | 3.9 (3.5)           | 121 (23)                    | 6.3 (5.1)           | 258 (50)                  | 2.5 (1.6)           |
| <b>Type of job</b>                |                                 |                     |                             |                     |                           |                     |
| Physicians                        | 233 (60)                        | 4.2 (3.5)           | 82 (21)                     | 6.5 (5.1)           | 183 (48)                  | 2.4 (1.7)           |
| Nurses                            | 172 (58)                        | 4.1 (3.6)           | 75 (27)                     | 7 (5.1)             | 174 (64)                  | 3 (1.5)             |
| Health technicians <sup>c</sup>   | 44 (55)                         | 4.1 (3.8)           | 24 (32)                     | 8.1 (6.2)           | 48 (67)                   | 3 (1.6)             |
| Other HCWs <sup>d</sup>           | 131 (52)                        | 3.2 (2.9)           | 42 (17)                     | 5.6 (4.4)           | 117 (47)                  | 2.4 (1.6)           |
| Ancillary workers <sup>e</sup>    | 74 (51)                         | 3.5 (3.5)           | 26 (18)                     | 6.1 (5.3)           | 64 (45)                   | 2.5 (1.6)           |
| Residential support workers       | 179 (51)                        | 3.6 (3.4)           | 60 (17)                     | 5.9 (4.9)           | 163 (49)                  | 2.5 (1.5)           |
| Other                             | 48 (63)                         | 4.1 (3.2)           | 17 (22)                     | 6.7 (5.1)           | 32 (44)                   | 2.3 (1.3)           |

*Note*

All percentages are valid percentages

GHQ-12 = General Health Questionnaire – 12, PHQ-9 = Patient Health Questionnaire – 9, PTSD = posttraumatic stress disorder, PC-PTSD-5 = Primary Care PTSD Screen for the DSM-5, HCWs = healthcare workers, PPE = personal protective equipment

<sup>a</sup> Number of respondents screening positive for mental health problems (cutoffs: PHQ-9 > 9, GHQ-12 > 2, and PC-PTSD > 2)

<sup>b</sup> Means and standard deviations of the total scores of the PHQ-9 (range: 0-27), the GHQ-12 (range: 0-12), and the PC-PTSD-5 (range: 0-5)

<sup>c</sup> Health technicians include nurse, X-ray, or laboratory technicians, among others

<sup>d</sup> Other HCWs include clinical psychologists, physiotherapists, or biologists, among others

<sup>e</sup> Ancillary workers include security staff, drivers, administrative staff, or cleaning staff, among others

**Supplementary Table 4.**

Association between participants' sociodemographic characteristics and COVID-19-related exposures, measured at baseline, and the probability of screening positive for psychological distress, depressive symptoms, and posttraumatic stress disorder symptoms, at follow-up (8 months). [The COVID-19 HEalth caRe wOrkErS (HEROES) Study, Spain, 2021]

|                                                              | Psychological distress (GHQ-12) |               |          |               | Depression symptoms (PHQ-9) |               |          |               | PTSD symptoms (PC-PTSD-5) |               |          |               |
|--------------------------------------------------------------|---------------------------------|---------------|----------|---------------|-----------------------------|---------------|----------|---------------|---------------------------|---------------|----------|---------------|
|                                                              | Unadjusted                      |               | Adjusted |               | Unadjusted                  |               | Adjusted |               | Unadjusted                |               | Adjusted |               |
|                                                              | OR                              | 95 percent CI | OR       | 95 percent CI | OR                          | 95 percent CI | OR       | 95 percent CI | OR                        | 95 percent CI | OR       | 95 percent CI |
| 18-35 years old [ref: > 50] <sup>a</sup>                     | 1.03                            | (0.67, 1.58)  | 0.94     | (0.61, 1.46)  | 1.60                        | (0.94, 2.71)  | 1.35     | (0.78, 2.33)  | 1.77                      | (1.15, 2.74)  | 1.58     | (1.01, 2.46)  |
| 35-50 years old [ref: > 50] <sup>a</sup>                     | 0.89                            | (0.6, 1.33)   | 0.84     | (0.56, 1.26)  | 1.24                        | (0.75, 2.07)  | 1.15     | (0.69, 1.93)  | 1.31                      | (0.87, 1.96)  | 1.23     | (0.82, 1.86)  |
| Female gender [ref: male] <sup>b</sup>                       | 1.82                            | (1.2, 2.77)   | 1.77     | (1.15, 2.72)  | 3.62                        | (1.75, 7.46)  | 3.21     | (1.54, 6.69)  | 1.91                      | (1.24, 2.93)  | 1.73     | (1.11, 2.7)   |
| University studies [ref: primary/secondary] <sup>c</sup>     | 0.76                            | (0.46, 1.23)  | 0.76     | (0.44, 1.3)   | 0.61                        | (0.36, 1.03)  | 0.58     | (0.32, 1.05)  | 0.78                      | (0.48, 1.27)  | 0.78     | (0.45, 1.33)  |
| Frontline position [ref: no] <sup>c</sup>                    | 0.92                            | (0.67, 1.28)  | 0.87     | (0.61, 1.24)  | 0.92                        | (0.61, 1.38)  | 0.86     | (0.54, 1.36)  | 1.68                      | (1.21, 2.35)  | 1.75     | (1.2, 2.54)   |
| Adequate access to PPE [ref: inadequate] <sup>c</sup>        | 0.61                            | (0.44, 0.85)  | 0.66     | (0.47, 0.93)  | 0.72                        | (0.48, 1.09)  | 0.83     | (0.54, 1.29)  | 0.58                      | (0.41, 0.81)  | 0.63     | (0.44, 0.9)   |
| Fear of getting infected [ref: none or low] <sup>c</sup>     | 1.32                            | (0.94, 1.86)  | 1.29     | (0.9, 1.84)   | 1.19                        | (0.77, 1.83)  | 1.10     | (0.69, 1.74)  | 1.79                      | (1.26, 2.53)  | 1.69     | (1.16, 2.45)  |
| Fear of infecting loved ones [ref: none or low] <sup>c</sup> | 1.15                            | (0.77, 1.72)  | 1.20     | (0.78, 1.85)  | 0.98                        | (0.59, 1.62)  | 0.88     | (0.51, 1.52)  | 1.96                      | (1.3, 2.97)   | 2.16     | (1.37, 3.4)   |

*Note*

GHQ-12 = General Health Questionnaire – 12 items, PHQ-9 = Patient Health Questionnaire – 9 items, PC-PTSD-5 = Primary Care PTSD Screen for DSM-5, OR = odds ratio, CI = confidence interval, PPE = personal protective equipment

<sup>a</sup> Adjusted for gender

<sup>b</sup> Adjusted for age

<sup>c</sup> Adjusted for age, gender, and region-level 14-day COVID-19 cumulative incidence (fixed factor)



**Supplementary Table 5.**

Association between participants' sociodemographic characteristics and COVID-19-related exposures, measured at baseline, and mental health outcomes' total scores (psychological distress, depressive symptoms, and posttraumatic stress disorder symptoms), measured at follow-up (8 months). [The COVID-19 HEalth caRe wOrkErS (HEROES) Study, Spain, 2021]

|                                           | Psychological distress (GHQ-12) |               |          |               | Depression symptoms (PHQ-9) |                |          |               | PTSD symptoms (PC-PTSD-5)* |                |          |                |
|-------------------------------------------|---------------------------------|---------------|----------|---------------|-----------------------------|----------------|----------|---------------|----------------------------|----------------|----------|----------------|
|                                           | Unadjusted                      |               | Adjusted |               | Unadjusted                  |                | Adjusted |               | Unadjusted                 |                | Adjusted |                |
|                                           | B                               | 95 percent CI | B        | 95 percent CI | B                           | 95 percent CI  | B        | 95 percent CI | B                          | 95 percent CI  | B        | 95 percent CI  |
| Age in years <sup>a</sup>                 | 0.00                            | (-0.03, 0.02) | 0.01     | (-0.01, 0.04) | -0.04                       | (-0.08, 0)     | 0.01     | (-0.02, 0.04) | -0.02                      | (-0.04, -0.01) | -0.02    | (-0.03, -0.01) |
| Female gender <sup>b</sup>                | 1.05                            | (0.32, 1.77)  | 0.32     | (-0.37, 1.01) | 2.14                        | (1.1, 3.18)    | 0.57     | (-0.32, 1.46) | 0.68                       | (0.34, 1.02)   | 0.31     | (-0.02, 0.64)  |
| Educational level <sup>c</sup>            | -0.22                           | (-0.57, 0.12) | -0.29    | (-0.63, 0.05) | -0.54                       | (-1.02, -0.05) | -0.36    | (-0.79, 0.07) | -0.16                      | (-0.32, 0)     | -0.23    | (-0.38, -0.07) |
| Frontline position <sup>c</sup>           | 0.13                            | (-0.42, 0.69) | -0.31    | (-0.88, 0.25) | 0.08                        | (-0.72, 0.89)  | -0.68    | (-1.41, 0.04) | 0.46                       | (0.2, 0.73)    | 0.33     | (0.06, 0.6)    |
| Adequate access to PPE <sup>c</sup>       | -0.53                           | (-0.86, -0.2) | -0.20    | (-0.52, 0.12) | -1.03                       | (-1.5, -0.56)  | -0.41    | (-0.81, 0)    | -0.37                      | (-0.52, -0.21) | -0.21    | (-0.36, -0.06) |
| Fear of getting infected <sup>c</sup>     | 0.25                            | (-0.13, 0.63) | -0.20    | (-0.58, 0.18) | 0.42                        | (-0.12, 0.96)  | -0.30    | (-0.78, 0.17) | 0.46                       | (0.28, 0.64)   | 0.27     | (0.09, 0.45)   |
| Fear of infecting loved ones <sup>c</sup> | 0.32                            | (-0.02, 0.66) | 0.13     | (-0.2, 0.46)  | 0.66                        | (0.17, 1.16)   | 0.03     | (-0.4, 0.45)  | 0.50                       | (0.34, 0.65)   | 0.42     | (0.27, 0.57)   |

*Note*

GHQ-12 = General Health Questionnaire – 12 items, PHQ-9 = Patient Health Questionnaire – 9 items, PC-PTSD-5 = Primary Care PTSD Screen for DSM-5, B = beta, CI = confidence interval, PPE = personal protective equipment

<sup>a</sup> Adjusted for gender and GHQ-12 / PHQ-9 baseline total score

<sup>b</sup> Adjusted for age and GHQ-12 / PHQ-9 baseline total score

<sup>c</sup> Adjusted for age, gender, GHQ-12 / PHQ-9 baseline total score, and region-level 14-day COVID-19 cumulative incidence (fixed factor)

\* Baseline assessment did not include PC-PTSD-5. Models are corrected using GHQ-12 baseline total score instead

**Supplementary Table 6.**

Association between participants' sociodemographic characteristics and COVID-19-related exposures, measured at baseline, and the probability of screening positive for psychological distress, depressive symptoms, and posttraumatic stress disorder symptoms, at follow-up (8 months). [The COVID-19 HEalth caRe wOrkErS (HEROES) Study, Spain, 2021]

|                                                              | Psychological distress (GHQ-12) |               |          |               | Depression symptoms (PHQ-9) |               |          |               | PTSD symptoms (PC-PTSD-5)* |               |          |               |
|--------------------------------------------------------------|---------------------------------|---------------|----------|---------------|-----------------------------|---------------|----------|---------------|----------------------------|---------------|----------|---------------|
|                                                              | Unadjusted                      |               | Adjusted |               | Unadjusted                  |               | Adjusted |               | Unadjusted                 |               | Adjusted |               |
|                                                              | OR                              | 95 percent CI | OR       | 95 percent CI | OR                          | 95 percent CI | OR       | 95 percent CI | OR                         | 95 percent CI | OR       | 95 percent CI |
| 18-35 years old [ref: > 50] <sup>a</sup>                     | 1.03                            | (0.67, 1.58)  | 0.92     | (0.57, 1.48)  | 1.60                        | (0.94, 2.71)  | 1.14     | (0.61, 2.12)  | 1.77                       | (1.15, 2.74)  | 1.59     | (0.97, 2.61)  |
| 35-50 years old [ref: > 50] <sup>a</sup>                     | 0.89                            | (0.6, 1.33)   | 0.77     | (0.49, 1.2)   | 1.24                        | (0.75, 2.07)  | 1.02     | (0.56, 1.84)  | 1.31                       | (0.87, 1.96)  | 1.21     | (0.76, 1.9)   |
| Female [ref: male] <sup>b</sup>                              | 1.82                            | (1.2, 2.77)   | 1.36     | (0.85, 2.16)  | 3.62                        | (1.75, 7.46)  | 2.34     | (1.08, 5.08)  | 1.91                       | (1.24, 2.93)  | 1.33     | (0.82, 2.16)  |
| University studies [ref: primary/secondary] <sup>c</sup>     | 0.76                            | (0.46, 1.23)  | 0.69     | (0.37, 1.26)  | 0.61                        | (0.36, 1.03)  | 0.70     | (0.35, 1.42)  | 0.78                       | (0.48, 1.27)  | 0.79     | (0.43, 1.44)  |
| Frontline position [ref: no] <sup>c</sup>                    | 0.92                            | (0.67, 1.28)  | 0.82     | (0.55, 1.2)   | 0.92                        | (0.61, 1.38)  | 0.78     | (0.46, 1.31)  | 1.68                       | (1.21, 2.35)  | 1.71     | (1.14, 2.58)  |
| Adequate access to PPE [ref: inadequate] <sup>c</sup>        | 0.61                            | (0.44, 0.85)  | 0.71     | (0.5, 1.03)   | 0.72                        | (0.48, 1.09)  | 0.84     | (0.51, 1.38)  | 0.58                       | (0.41, 0.81)  | 0.71     | (0.48, 1.05)  |
| Fear of getting infected [ref: none or low] <sup>c</sup>     | 1.32                            | (0.94, 1.86)  | 1.05     | (0.71, 1.54)  | 1.19                        | (0.77, 1.83)  | 1.00     | (0.6, 1.66)   | 1.79                       | (1.26, 2.53)  | 1.18     | (0.78, 1.79)  |
| Fear of infecting loved ones [ref: none or low] <sup>c</sup> | 1.15                            | (0.77, 1.72)  | 1.05     | (0.66, 1.68)  | 0.98                        | (0.59, 1.62)  | 0.64     | (0.35, 1.2)   | 1.96                       | (1.3, 2.97)   | 1.99     | (1.2, 3.29)   |

Note.

GHQ-12 = General Health Questionnaire – 12 items, PHQ-9 = Patient Health Questionnaire – 9 items, PC-PTSD-5 = Primary Care PTSD Screen for DSM-5, OR = odds ratio, CI = confidence interval, PPE = personal protective equipment

<sup>a</sup> Adjusted for gender and probable psychological distress (GHQ-12) or depression (PHQ-9) at baseline

<sup>b</sup> Adjusted for age and probable psychological distress (GHQ-12) or depression (PHQ-9) at baseline

<sup>c</sup> Adjusted for age, gender, probable psychological distress (GHQ-12) or depression (PHQ-9) at baseline, and region-level 14-day COVID-19 cumulative incidence (fixed factor)

\* Baseline assessment did not include PC-PTSD-5. Models are corrected using GHQ-12 baseline total score instead

Cut-off scores used: GHQ-12 > 2, PHQ-9 > 9, and PC-PTSD-5 > 2
